# Supplementary material
Source: Springer Nature journal article supplement (https://www.springermedizin.de/resource/supplementary/13075_2012_3636_MOESM1_ESM.pdf/9694980)

## A. Chondrogenic capacity

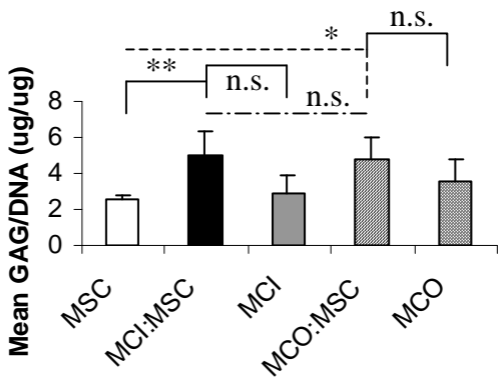

## B. Proliferation index

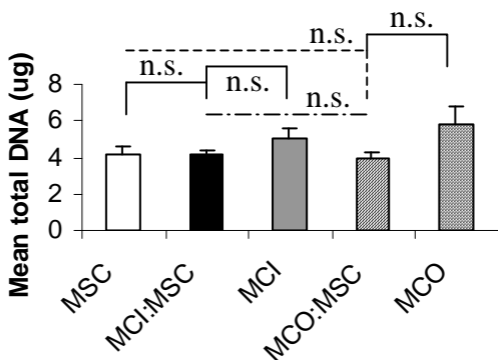

## C. GAG induction

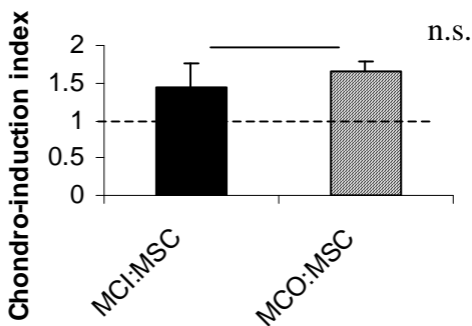

Supplement: MOESM1 [file 9694980]
